# Supplementary material for: Solvent-free oxidation of ethylbenzene over hierarchical flower-like core–shell structured Co-based mixed metal oxides with significantly enhanced catalytic performance
Source: Royal Society of Chemistry journal article supplement (doi:10.1039/c4cy00744a), 2014-09-17
Supplement: c4cy00744a1.pdf [file c4cy00744a1.pdf]

## Supplementary materials

### Solvent-free oxidation of ethylbenzene over hierarchical flower-like core-shell structured Co-based mixed metal oxides with significantly enhanced catalytic performance

*Renfeng Xie, Guoli Fan, Lan Yang, Feng Li*

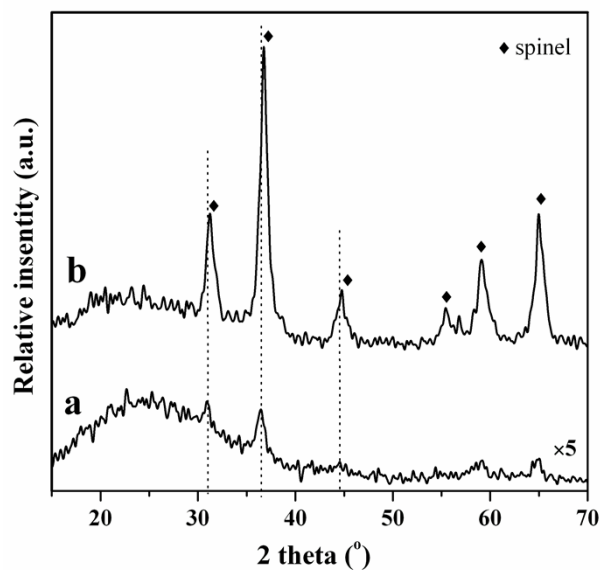

**Fig.S1** XRD patterns of Im-MMO-0.5/A (a) and MMO-0.5 (b)

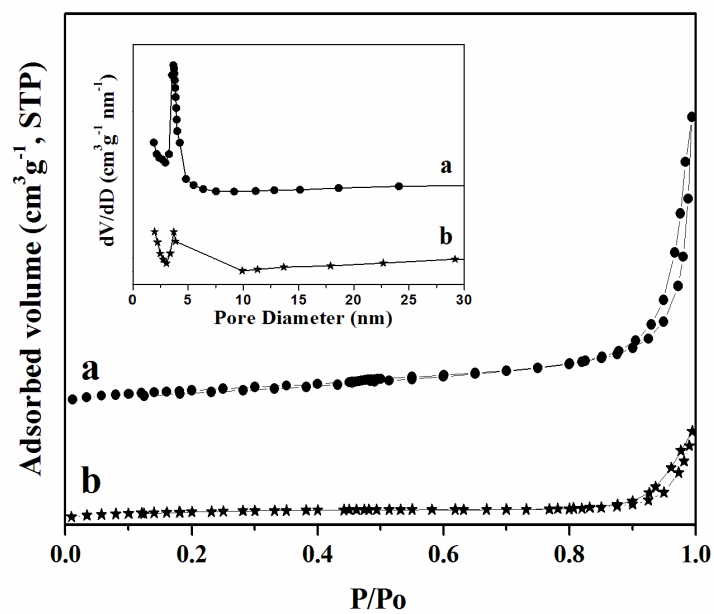

**Fig.S2** Nitrogen adsorption–desorption isotherms of MMO-0.5 (a) and Im-MMO-0.5/A (b). Inset shows the pore size distributions.

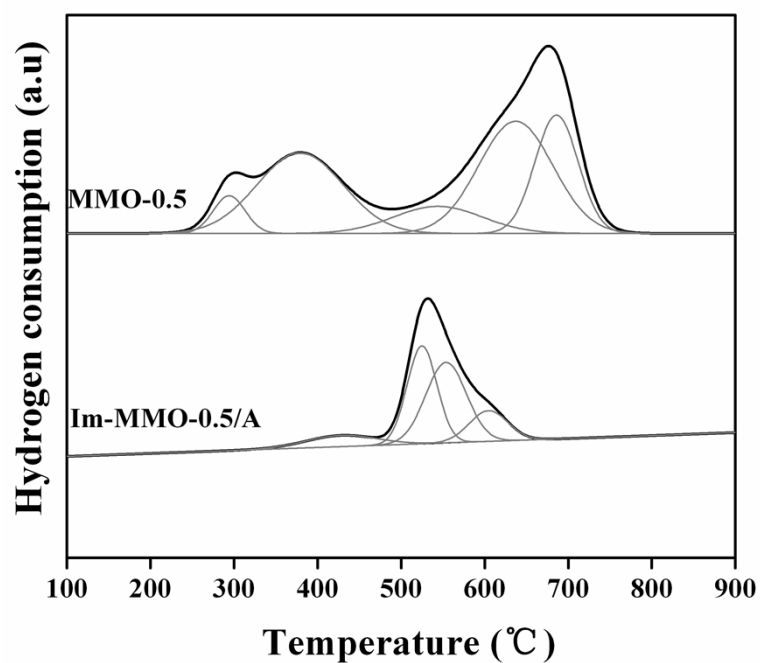

**Fig.S3** H<sub>2</sub>-TPR profiles of comparison samples.
